# Supplementary material for: Constructing Ni(OH)2 nanosheets on a nickel foam electrode for efficient electrocatalytic ethanol oxidation
Source: Royal Society of Chemistry journal article supplement (doi:10.1039/d5dt01777g), 2025-01-01
Supplement: d5dt01777g1.pdf [file d5dt01777g1.pdf]

## Electronic Supplementary Information

### Constructing Ni(OH)<sub>2</sub> nanosheets on nickel foam electrode for efficient electrocatalytic ethanol oxidation

Shasha Ma, Di Chen, Zhaobin Ye, Yuanlong Wang, Jie Xu and Jianyong Zhang\*

*Sun Yat-Sen University, MOE Laboratory of Polymeric Composite and Functional Materials, School of Materials Science and Engineering, Guangzhou 510275, China. E-mail: zhjyong@mail.sysu.edu.cn.*

## Experimental section

### Materials and characterization

Nickel foam (1.5 mm thickness) was procured from commercial source and cut into 1 cm × 1.5 cm. All materials and solvents were used without further purification unless otherwise specified. Hydrochloric acid (HCl, 36~38 wt.%) was diluted to 3 mol L<sup>-1</sup> to remove the oxide layer from the nickel foam. Scanning electron microscopy (SEM) of the self-supporting NF electrodes was tested on a ZEISS Gemini 500 field emission scanning electron microscope (working voltage 10 kV, working current 10 μA). TEM were conducted on a Tecnai G2 F30 S-Twin transmission electron microscope. Samples were prepared by dispersing in EtOH upon sonication and placing on top of the carbon grid. X-ray diffraction (XRD) patterns were obtained on a MiniFlex600 instrument using Cu Kα ( $\lambda = 0.15468$  nm) as the radiation source, and the scanning rate is 10 degrees per minute. Fourier transform infrared (FT-IR) spectra were recorded using a Thermo Fisher Nicolet iS10 spectrometer with KBr pellets. <sup>1</sup>H NMR spectra were acquired on a Bruker AVANCE AV 400 MHz spectrometer. *In-situ* Raman spectra were recorded using an XploRA PLUS instrument (Horiba) using a 532 nm laser in the region of 100 – 1000 cm<sup>-1</sup>. The FU-NF electrode was assembled into a sealed spectroelectrochemical cell as the working electrode, Hg/HgO was used as the reference electrode, high-purity graphite as the counter electrode, and 1 mol L<sup>-1</sup> KOH + 1 mol L<sup>-1</sup> EtOH as the electrolyte. Amperometric measurements were conducted on a CHI660E electrochemical workstation (Chenhua) at open circuit potential and potential windows from 1.20 to 1.44 V vs. RHE, while in-situ Raman spectra were collected. Each Raman spectrum was collected with an integration time of 10 s and five times accumulations.

### Electrochemical measurement

All the electrochemical measurements were performed in a three/two-electrode electrochemical workstation (CHI660E, Shanghai CH Instrument). A conventional three-electrode system was composed of Hg/HgO (saturated KCl solution) as reference electrode, a graphite rod as counter electrode and the as-obtained self-supported Nickel foam electrode directly as working electrode. The electrolyte was 1.0 mol L<sup>-1</sup> KOH aqueous solution for OER and 1.0 mol L<sup>-1</sup> KOH aqueous solution with 1.0 mol L<sup>-1</sup> ethanol for EOR. Linear-sweep voltammogram curves and cyclic voltammogram were conducted at a scan rate of 50 mV s<sup>-1</sup>. The potentials registered vs Hg/HgO

as reference electrode were corrected for the uncompensated resistance using the formula  $E_{\text{corrected}} = E_{\text{uncorrected}} - 95\% \times iR$ , where  $R$  is the solution resistance obtained by electrochemical impedance spectroscopy (EIS), which was conducted at an AC voltage amplitude of 10 mV with frequencies ranging from  $10^5$  to  $10^{-1}$  Hz. Moreover, all potentials were converted into potentials versus RHE utilizing the formula  $E_{\text{RHE}} = E_{\text{corrected}} + E^0(\text{Hg/HgO}) + 0.059 \times \text{pH}$ . Electrochemical double-layer capacitance ( $C_{\text{dl}}$ ) was evaluated using different scan rates (20, 40, 60, 80, 100 mV s<sup>-1</sup>) in the non-Faradaic region. The electrochemical stability was tested by chronoamperometric and chronopotentiometric measurements.

### Preparation of NF electrodes

FU-NF was synthesized via one-step solvothermal method. Prior to preparation, Ni foam (2 cm × 2 cm × 1.5 mm) was ultrasonically cleaned for 15 min in 1 mol L<sup>-1</sup> HCl to remove the surface oxide layer, and then the Ni foam was washed with deionized water and ethanol. Fumaric acid (116.1 mg, 1 mmol) was dissolved in 5 mL DMF under ultrasonication. The pretreated Ni foam was then immersed in this solution in a capped glass bottle, and heated at 80 °C for 2 h. After cooling to room temperature, the substrate was taken out and washed with deionized water. The resulting electrode was denoted as FU-NF. The electrochemical activation was conducted on a CHI660E electrochemistry workstation. The FU-NF electrode was activated by applying a constant potential of 1.4 V vs. RHE in 1.0 mol L<sup>-1</sup> KOH + 1 mol L<sup>-1</sup> ethanol. After test, FU-NF was washed with deionized water and ethanol three times. The resulting FU-NF electrode was under ultrasonication in ethanol and the powder FU-NF was separated by centrifugation.

BTC-NF and FDC-NF were prepared using 1,3,5-benzenetricarboxylic acid (210.1 mg, 1 mmol) and 2,5-furandicarboxylic acid (156.1 mg, 1 mmol), respectively, instead of fumaric acid. Phytate-NF and Tannate-NF were prepared using an aqueous solution of phytic acid (0.2 mol L<sup>-1</sup>) and tannic acid (0.2 mol L<sup>-1</sup>), respectively, instead of fumaric acid.

DMF-NF was prepared using the same solvothermal procedures as FU-NF but without adding fumaric acid. A piece of pretreated nickel foam (2 cm × 2 cm × 1.5 mm) was immersed in 5 mL of DMF in a capped glass bottle and heated at 80 °C for 2 h. After cooling to room temperature the

nickel foam was washed with deionized water. The resulting electrode was referred to as DMF-NF. As for DIW-NF and AcO-NF, 5 mL deionized water and acetic acid solution were used instead of DMF.

For Bz-NF, benzoic acid (122.1 mg, 1 mmol) was dissolved in 5 mL of DMF under ultrasonication. The pretreated Ni foam was immersed in this solution, sealed in a capped glass bottle, and heated at 80 °C for 2 h. The resulting Ni foam was washed with deionized water, and dried, yielding the electrode denoted as Bz-NF.

### Determination of $\text{CH}_3\text{COO}^-$ by $^1\text{H}$ NMR

To determine the liquid products of the EOR, the electrolyte after chronopotentiometric measurement was detected by  $^1\text{H}$  NMR. The concentration of the liquid product was calculated by comparing the integral area of the methyl group of  $\text{CH}_3\text{COOK}$  and  $\text{CH}_3\text{CH}_2\text{OH}$ . The standard curve was determined by a series of standard solutions of acetic acid in  $1 \text{ mol L}^{-1}$  EtOH aqueous solution.

Faradic efficiency was calculated through the equation

$$\text{CH}_3\text{COO}^- \text{ Faradic efficiency} = \frac{4 \times F \times V \times \Delta c_{\text{CH}_3\text{COO}^-}}{Q} \times 100\%$$

where  $\Delta c_{\text{CH}_3\text{COO}^-}$  is the change in  $\text{CH}_3\text{COO}^-$  concentration after electrolysis,  $F$  is the Faradaic constant ( $96485 \text{ C mol}^{-1}$ ),  $V$  is the volume of catholyte electrolyte (40 mL), and  $Q$  is the total electric charge passing the electrode during the electrolysis.

The hourly production rate of potassium acetate was calculated through the equation

$$\text{CH}_3\text{COO}^- \text{ yield} = (\Delta c_{\text{CH}_3\text{COO}^-} \times V) / (t \times S)$$

where  $\Delta c_{\text{CH}_3\text{COO}^-}$  is the change in  $\text{CH}_3\text{COO}^-$  concentration after electrolysis,  $V$  is the volume of catholyte electrolyte (40 mL),  $t$  is the reaction time, and  $S$  is the geometric area of working electrode.

### Hybrid electrolysis

Hybrid electrolysis was evaluated using a two-electrode configuration using the electrode FU-NF (or NF) as the anode and the electrode CuO/CF (or CF) as the cathode separated by a Nafion 115 membrane. The concentrations of generated  $\text{NH}_3$  (cathode) and acetate (anode) in the two-electrode system were quantified by  $^1\text{H}$  NMR spectroscopy to calculate the Faradaic efficiency.

### Mechanism of EOR

The mechanism of the ethanol oxidation to acetate occurring in an alkaline electrolyte is proposed to involve the following steps according to the literature.<sup>11,38</sup>

(1) Activation of  $\text{Ni}(\text{OH})_2$  to  $\text{NiOOH}$ :  $\text{Ni}(\text{OH})_2 + \text{OH}^- \rightarrow \text{NiOOH} + \text{H}_2\text{O} + e^-$ ;

(2) Oxidation of adsorbed ethanol:  $\text{CH}_3\text{CH}_2\text{OH} + 4\text{NiOOH} + \text{OH}^- \rightarrow \text{CH}_3\text{COO}^- + 4\text{Ni}(\text{OH})_2$

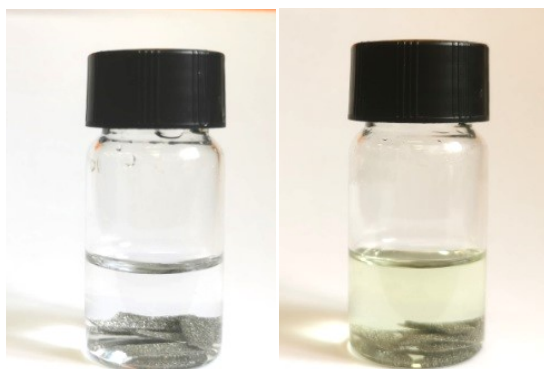

**Fig. S1** Photographs of FU-NF in a capped bottle (left) before and (right) after the solvothermal process.

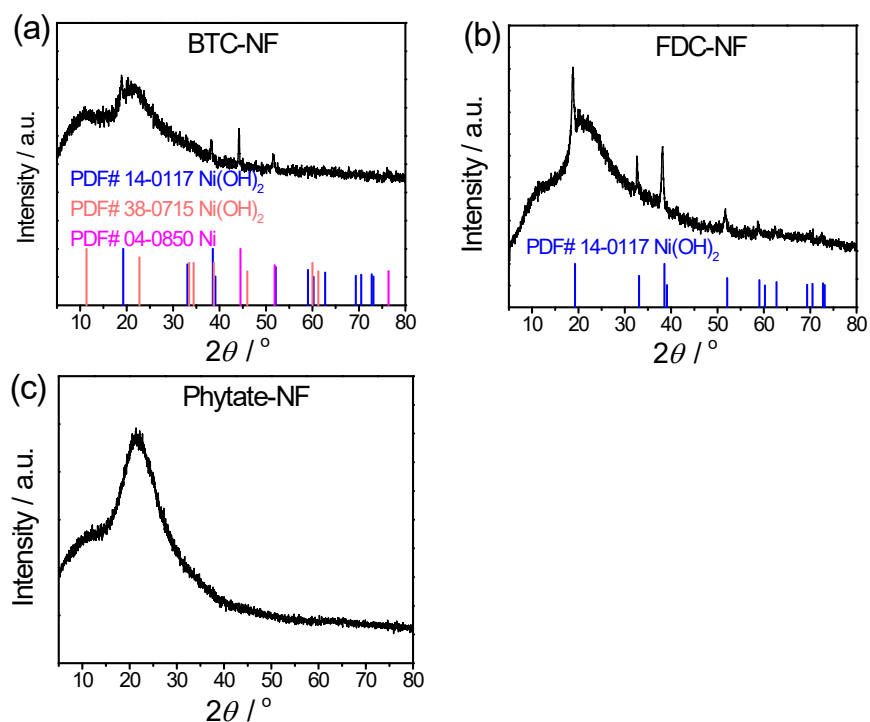

**Fig. S2** XRD patterns of (a) powder BTC-NF, (b) powder FDC-NF and (d) powder Phytate-NF.

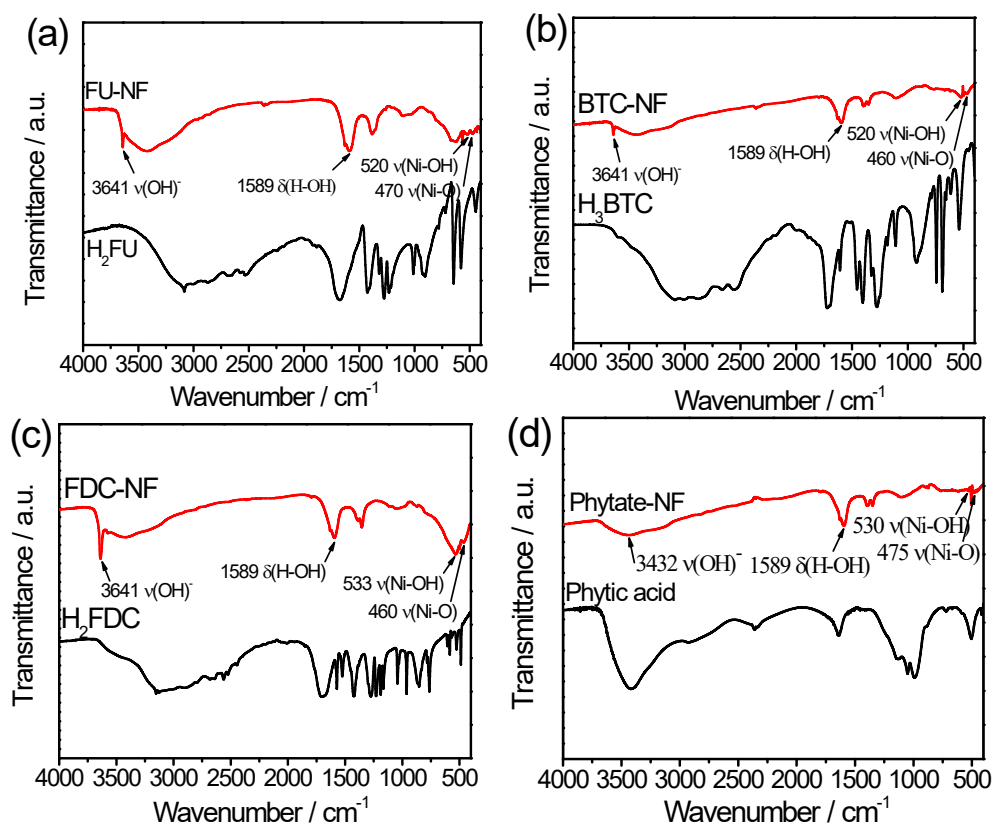

**Fig. S3** FT-IR spectra of FU-NF, BTC-NF, FDC-NF and Phytate-NF.

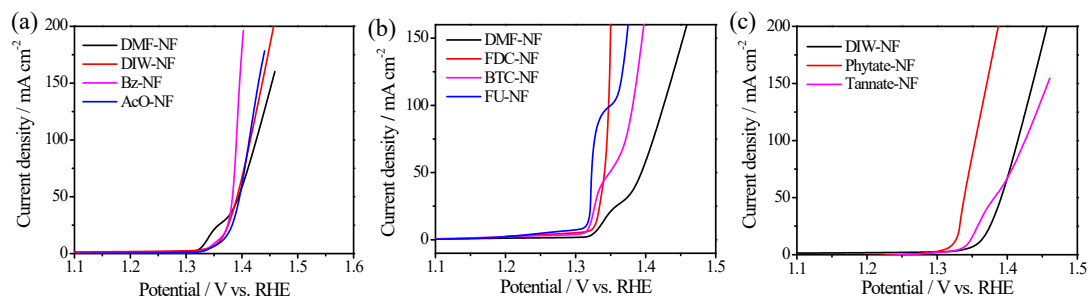

**Fig. S4** (a) IR-corrected LSV curves of DMF-NF, DIW-NF, Bz-NF and AcO-NF toward EOR in  $1.0 \text{ mol L}^{-1} \text{ KOH}$  and  $1.0 \text{ mol L}^{-1} \text{ EtOH}$ , (b) LSV curves of DMF-NF, FDC-NF, BTC-NF and FU-NF, and (c) LSV curves of DIW-NF, Phytate-NF and Tannate-NF.

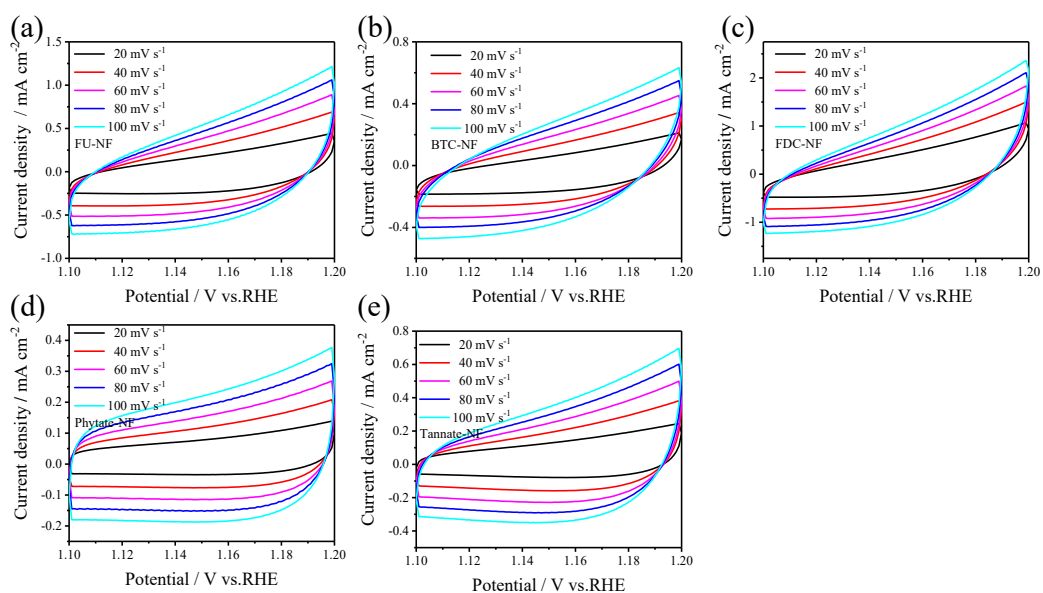

**Fig. S5** CV curves of (a) FU-NF, (b) BTC-NF, (c) FDC-NF, (d) Phytate-NF and (e) Tannate-NF at different scan rates from  $20$  to  $100 \text{ mV s}^{-1}$  in the non-Faradic region.

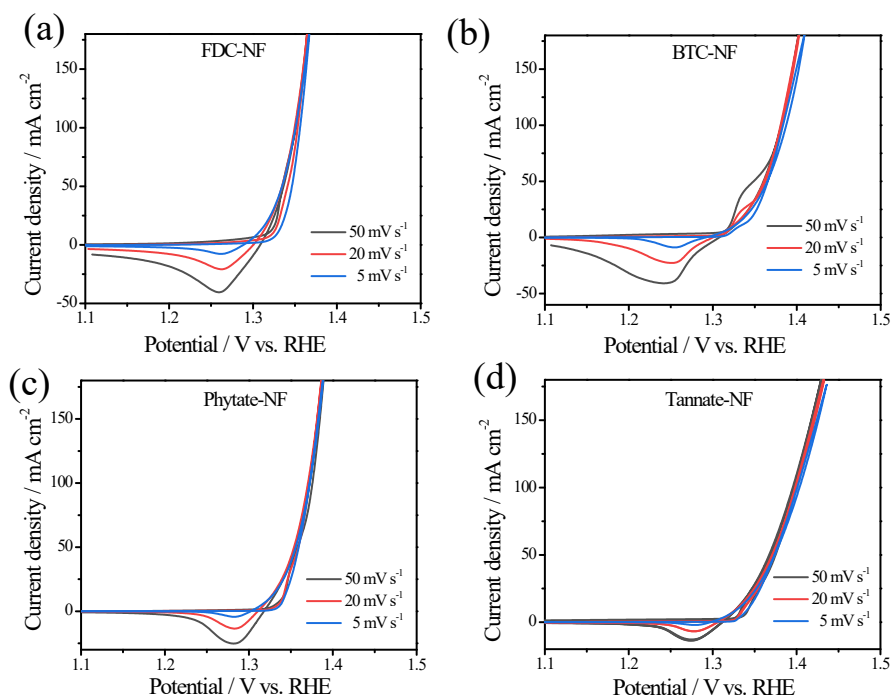

**Fig. S6** CV curves of (a) FDC-NF, (b) BTC-NF, (c) Phytate-NF and (d) Tannate-NF in 1.0 mol L<sup>-1</sup> KOH with 1.0 mol L<sup>-1</sup> EtOH at different scan rates.

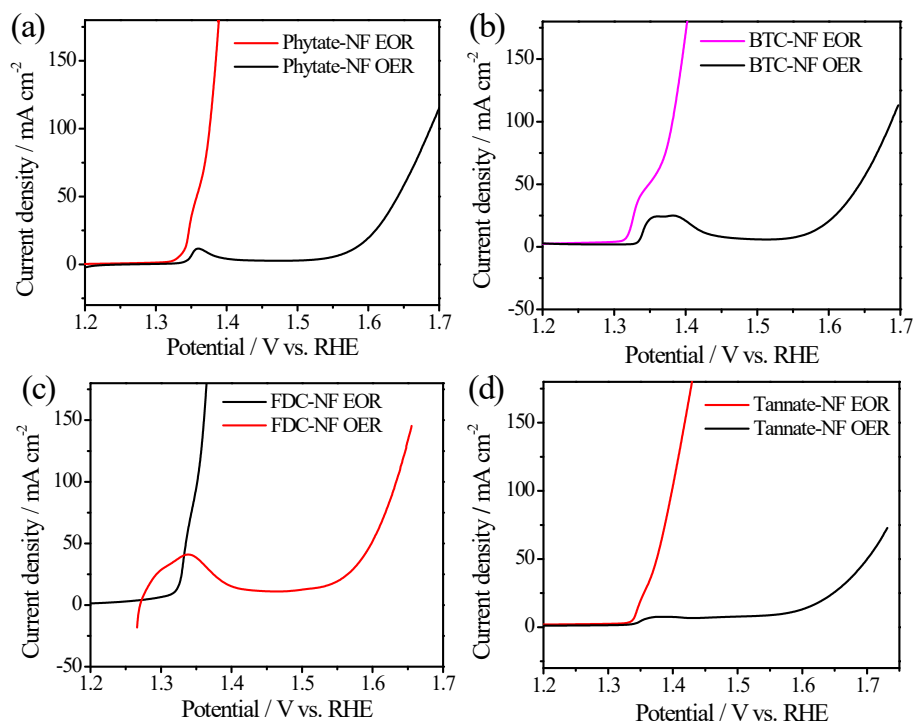

**Fig. S7** LSV curves of EOR (in 1.0 mol L<sup>-1</sup> KOH with 1.0 mol L<sup>-1</sup> EtOH) and OER (in only 1.0 mol L<sup>-1</sup> KOH) of (a) Phytate-NF, (b) BTC-NF, (c) FDC-NF and (d) Tannate-NF.



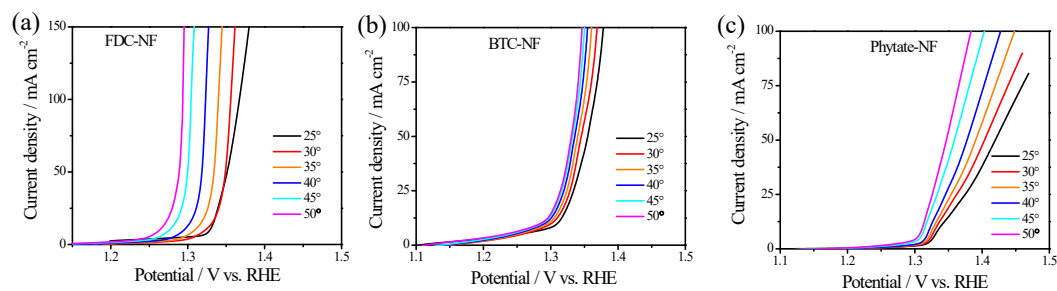

**Fig. S8** LSV curves of (a) FDC-NF, (b) BTC-NF and (c) Phytate-NF at 25, 30, 35, 40, 45 and 50 °C.

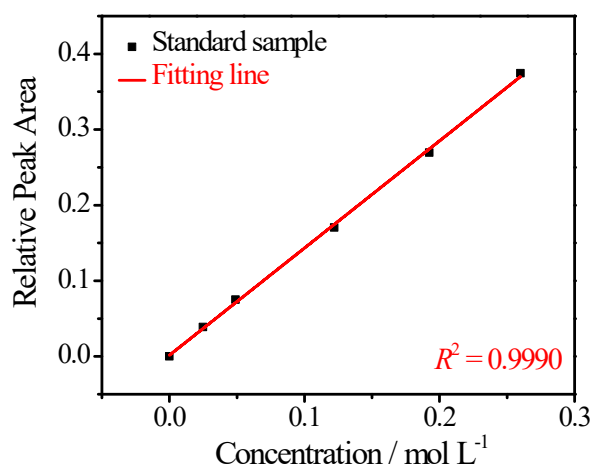

**Fig. S9** Standard curve between acetic acid product at different concentration and the relative peak area in <sup>1</sup>H NMR.

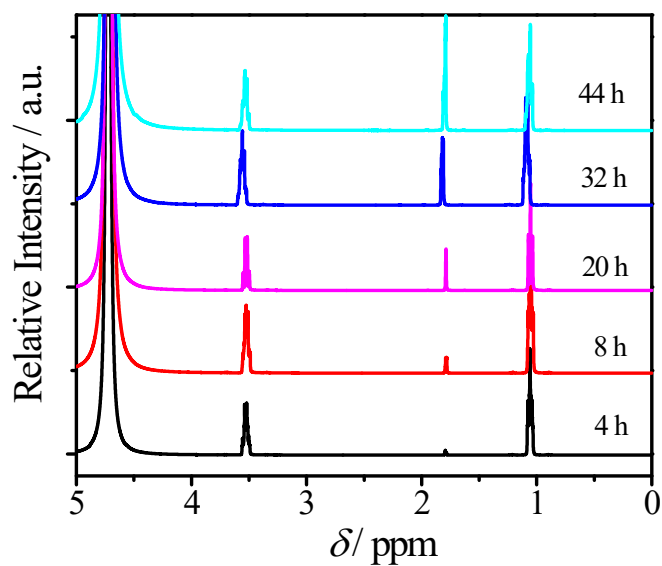

**Fig. S10** <sup>1</sup>H NMR measurements of the products after chronopotentiometry test at 40 mA cm<sup>-2</sup> for 4, 8, 20, 32 and 44 h on the FU-NF electrode.

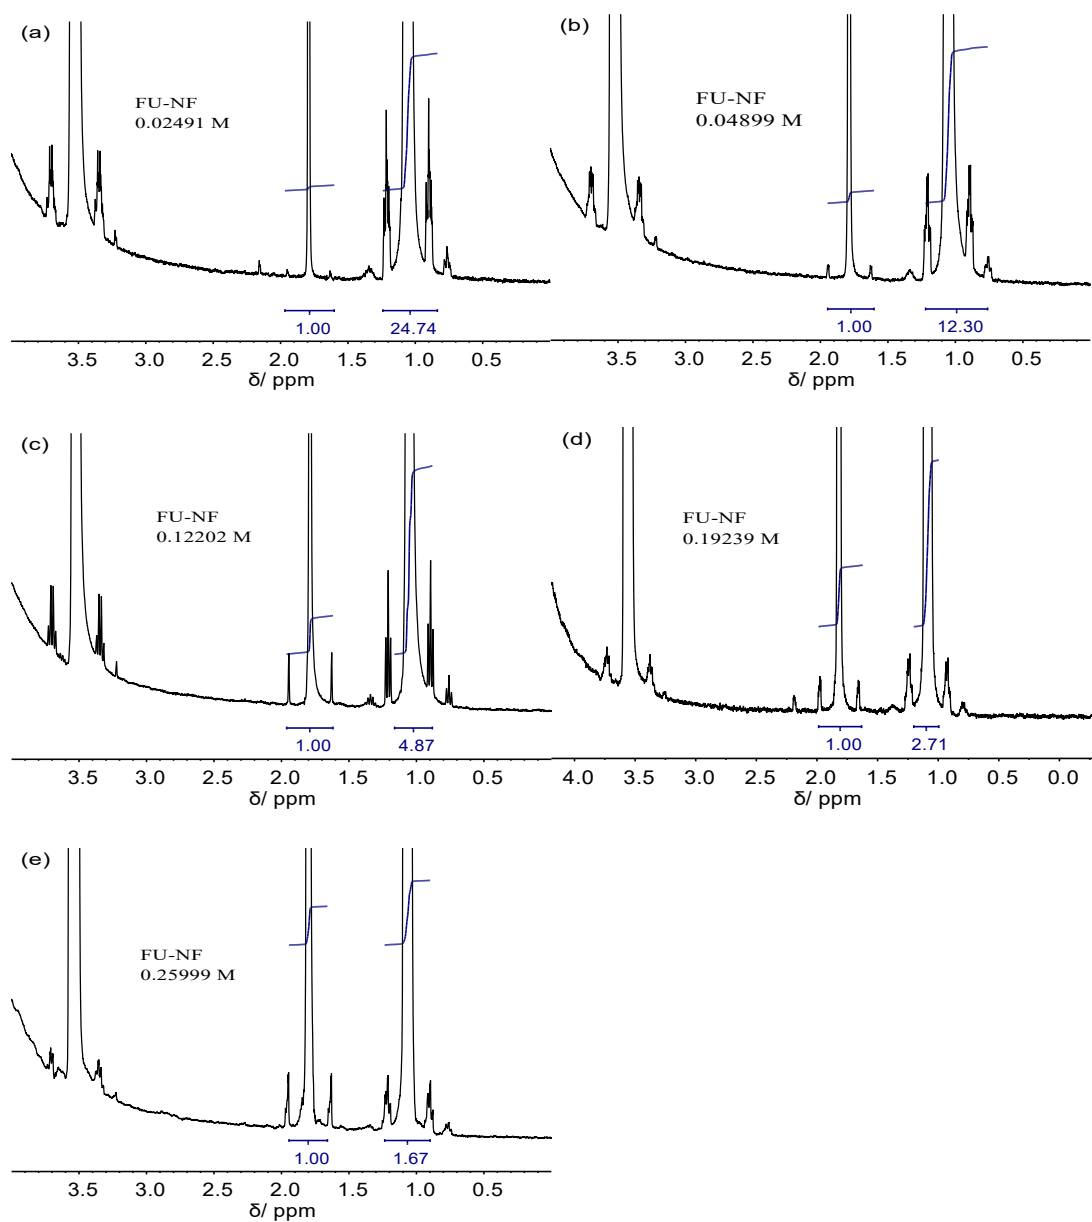

**Fig. S11**  $^1\text{H}$  NMR measurements of the products after chronopotentiometry test at  $40\text{ mA cm}^{-2}$  for (a) 4 h, (b) 8 h, (c) 20 h, (d) 32 h and (e) 44 h on the FU-NF electrode.

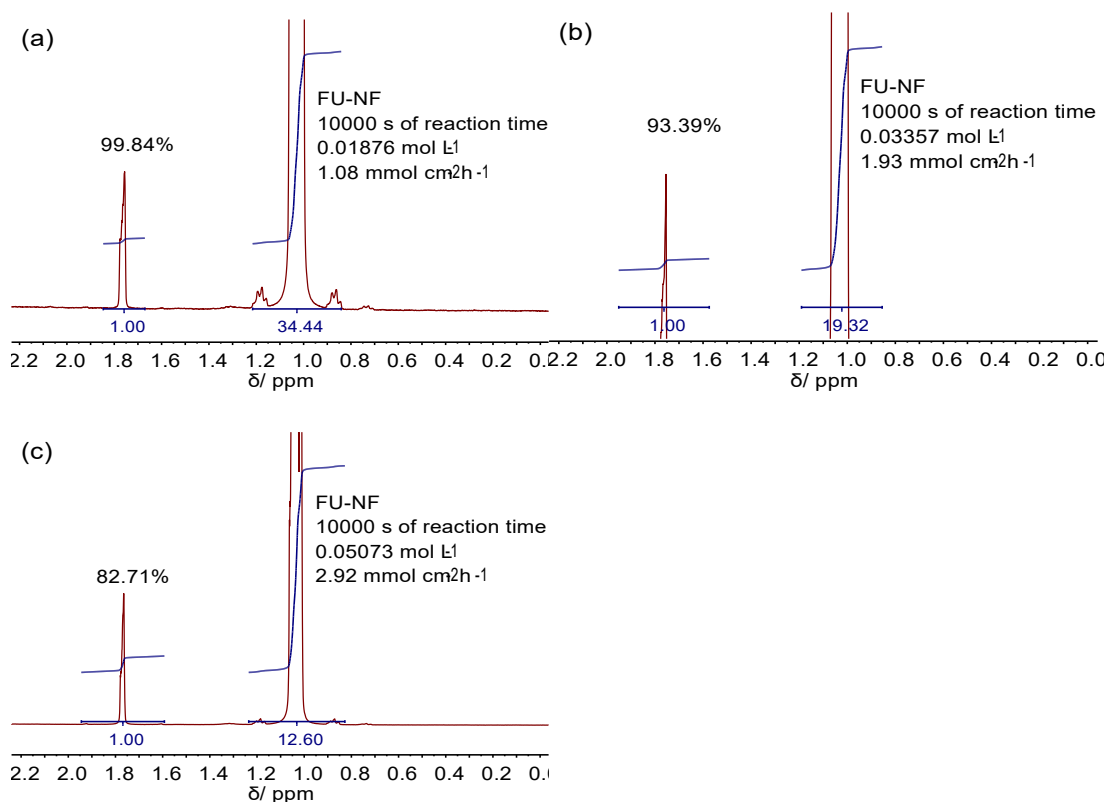

**Fig. S12** Faradaic efficiency and acetate production rate for the reaction products obtained with the FU-NF electrode at (a) 1.4, (b) 1.5 and (c) 1.6 V<sub>RHE</sub>.

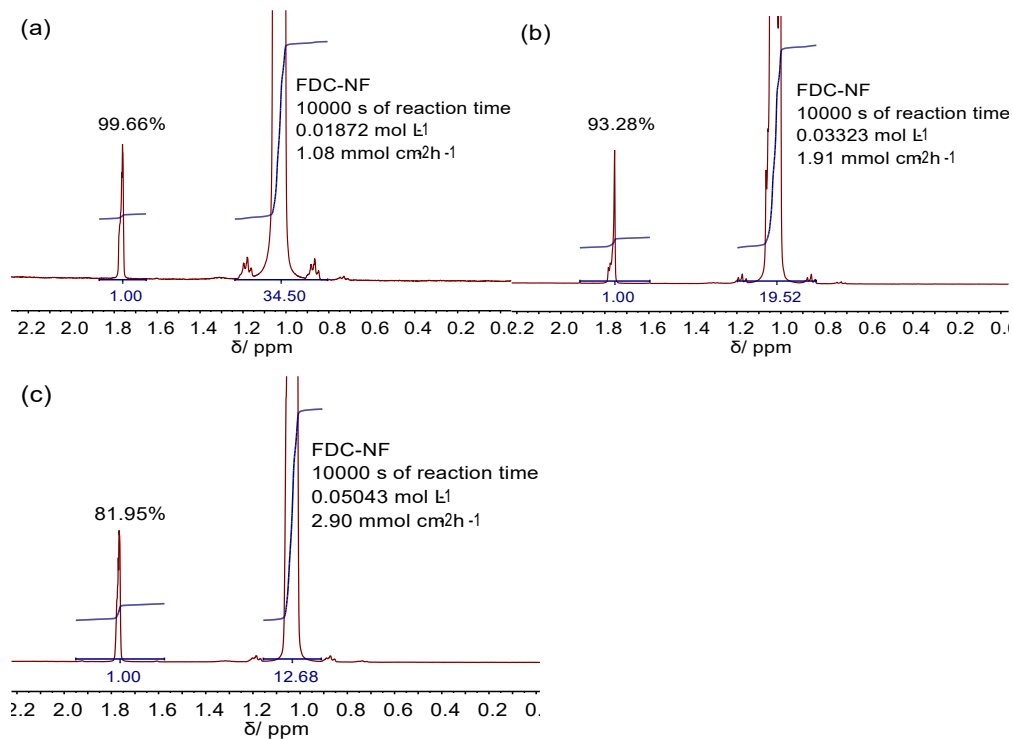

**Fig. S13** Faradaic efficiency and acetate production rate for the reaction products obtained with the FDC-NF electrode at (a) 1.4, (b) 1.5 and (c) 1.6 V<sub>RHE</sub>.

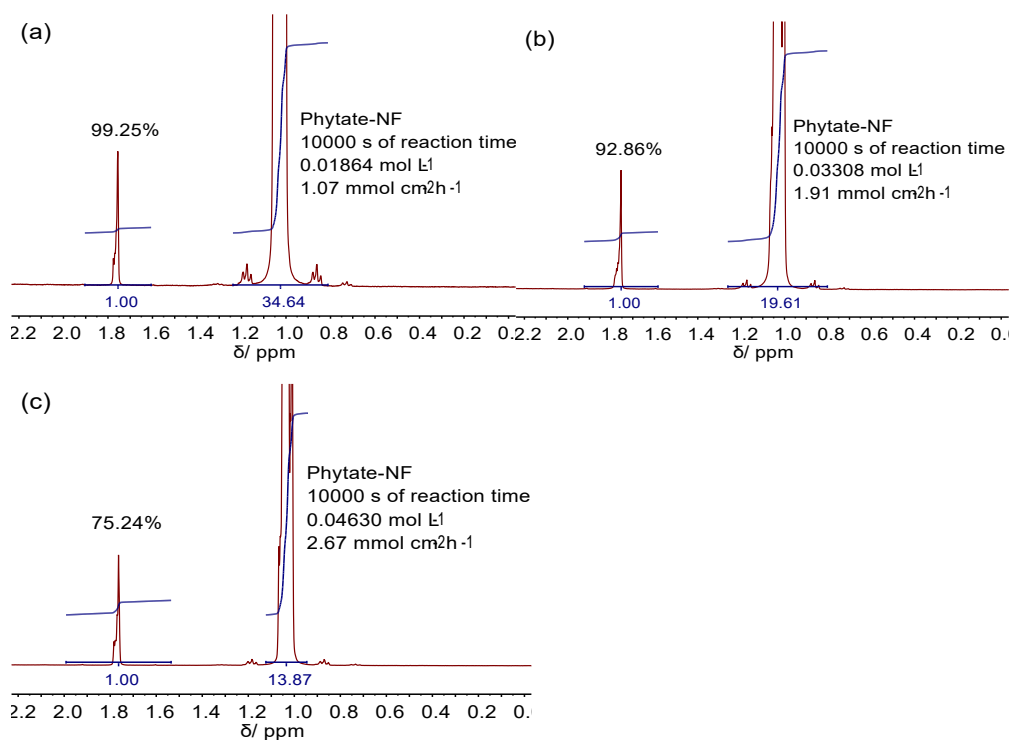

**Fig. S14** Faradaic efficiency and acetate production rate for the reaction products obtained with the Phytate-NF electrode at (a) 1.4, (b) 1.5 and (c) 1.6 V<sub>RHE</sub>.

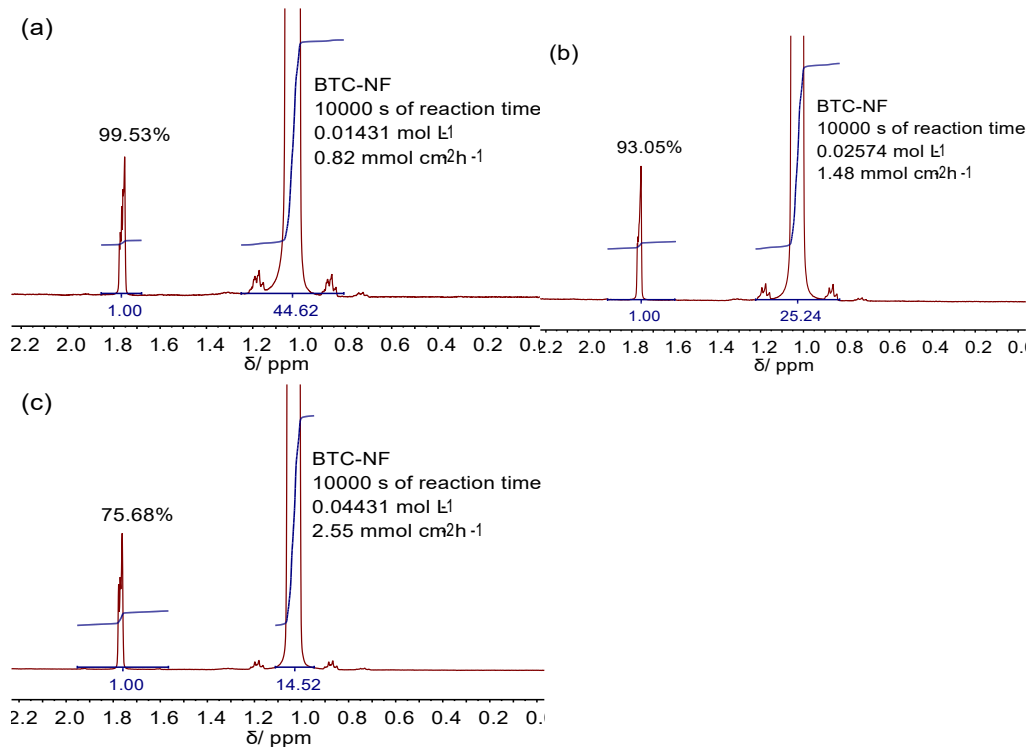

**Fig. S15** Faradaic efficiency and acetate production rate for the reaction products obtained with the BTC-NF electrode at (a) 1.4, (b) 1.5 and (c) 1.6 V<sub>RHE</sub>.

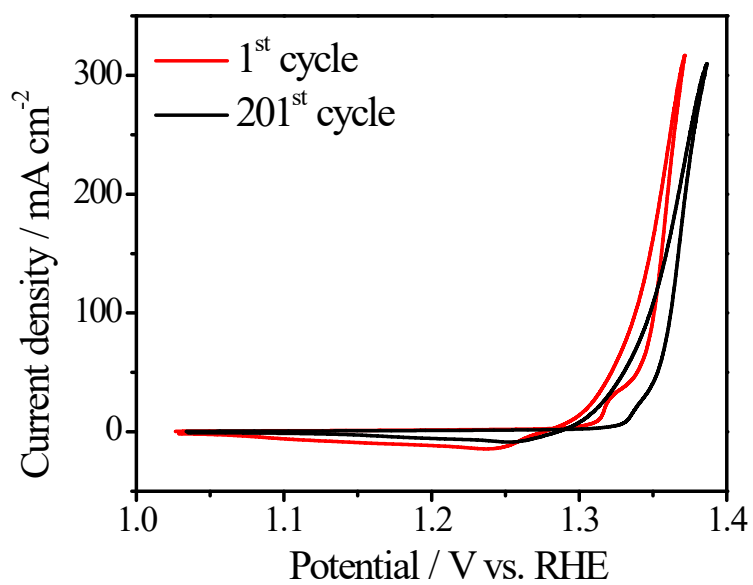

**Fig. S16** CV cycling stability test of FU-NF at a scan rate of  $50 \text{ mV s}^{-1}$ .

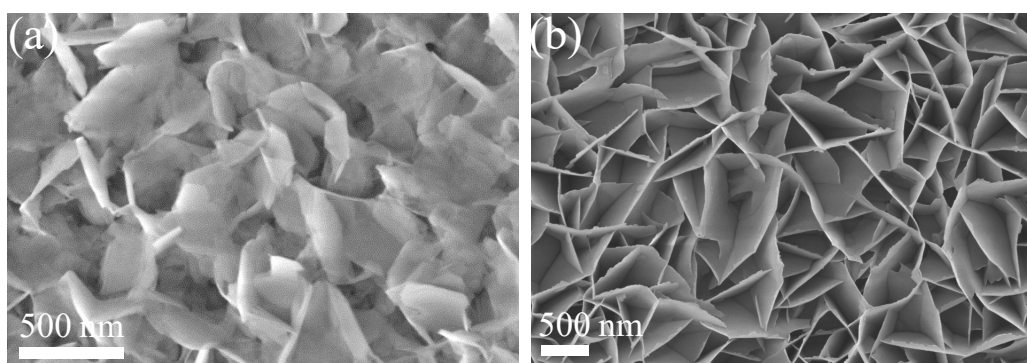

**Fig. S17** SEM images of FU-NF (a) before and (b) after the long-term chronopotentiometric measurement at  $1.5 \text{ V}$  for  $10000 \text{ s}$ .

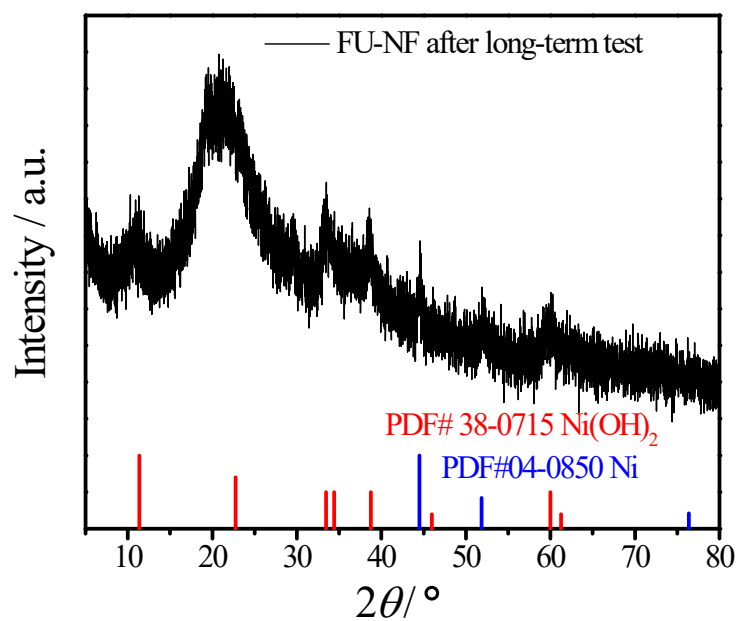

**Fig. S18** XRD pattern of powder FU-NF after the long-term chronopotentiometric measurement at 1.5 V for 10000 s.

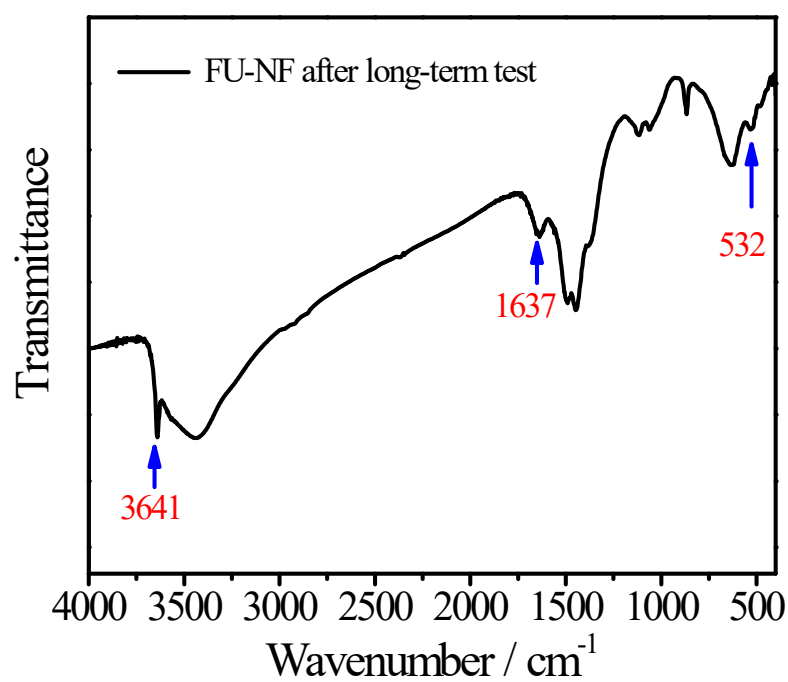

**Fig. S19** FT-IR spectrum of powder FU-NF after the long-term chronopotentiometric measurement at 1.5 V for 10000 s.

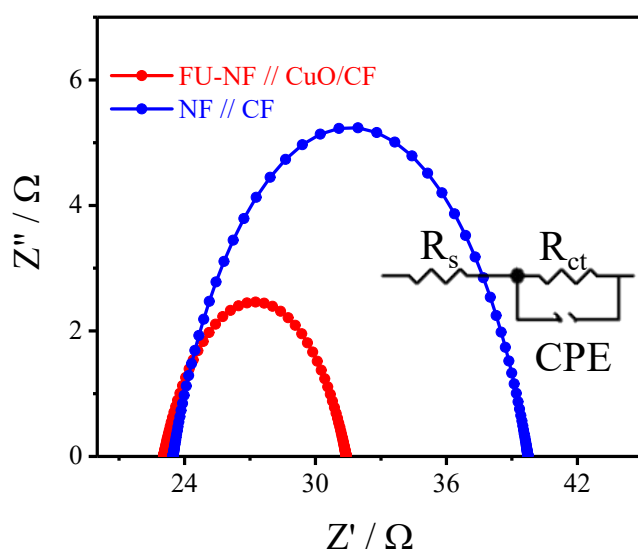

**Fig. S20** Electrochemical impedance spectroscopy (EIS) analyses for FU-NF // CuO/CF and NF // CF at 1.4 V vs RHE (inset is the equivalent circuit).

**Table S1** Comparison of the EOR performance of FU-NF electrode in terms of Tafel slope and potential at a current density of 100 mA cm<sup>-2</sup> with some state-of-the-art Ni-based electrocatalysts.

| Catalyst                                                   | Potential at 100 mA cm <sup>-2</sup> / V | Tafel slope /mV dec <sup>-1</sup> | Ref.      |
|------------------------------------------------------------|------------------------------------------|-----------------------------------|-----------|
| NiO@CeO <sub>2</sub>                                       | ≈1.70                                    | 21                                | [55]      |
| NiCo-LDHs                                                  | ≈1.54                                    | 71.58                             | [56]      |
| Co <sub>1</sub> Ni <sub>0.5</sub> Mn <sub>1</sub> BDC@NF-A | 1.30                                     | 31                                | [57]      |
| NiOOH-CuO/CF                                               | ≈1.35                                    | 33.3                              | [39]      |
| NiOOH@Co-NCO                                               | 1.340                                    | 31.3                              | [11]      |
| Co(OH) <sub>2</sub> @Ni(OH) <sub>2</sub>                   | 1.389                                    | 55                                | [19]      |
| CO(NH <sub>2</sub> ) <sub>2</sub> /NF                      | ≈1.39                                    | 81.68                             | [33]      |
| FU-NF                                                      | 1.353                                    | 46.89                             | This work |
